# Supplementary material for: Occurrence of Bacterial Pathogens and Human Noroviruses in Shellfish-Harvesting Areas and Their Catchments in France
Source: PubMed Central journal article supplement (PMC6193098; doi:10.3389/fmicb.2018.02443), 2018-10-11
Supplement: Data_Sheet_3.pdf [file Data_Sheet_3.pdf]

### Supplementary data S3

Supplementary Table 2. Primers used in this study

| Primer                                                                          | Sequence (5'-3')       | Reference             | Size of amplicon (bp) |
|---------------------------------------------------------------------------------|------------------------|-----------------------|-----------------------|
| <b>Primers used for classification of <i>E. coli</i> in phylogenetic groups</b> |                        |                       |                       |
| chuA.1                                                                          | GACGAACCAACGGTCAGGAT   | Clermont et al., 2000 | 279                   |
| chuA.2                                                                          | TGCCGCCAGTACCAAAGACA   | Clermont et al., 2000 |                       |
| yjaA.2                                                                          | ATGGAGAATGCGTTCTCAAC   | Clermont et al., 2000 | 168                   |
| yjaabisF                                                                        | ATCGCCAATTTCTTTGTTGC   | This study            |                       |
| tspE4C2.1                                                                       | GAGTAATGTCGGGGCATTCA   | Clermont et al., 2000 | 152                   |
| tspE4C2.2                                                                       | CGCGCCAACAAAGTATTACG   | Clermont et al., 2000 |                       |
| <b>Primers used for detection of virulence genes in enterococci</b>             |                        |                       |                       |
| RTespL                                                                          | GAGTTAGCGGGAACAGGTCA   | This study            | 101                   |
| RTespR                                                                          | ATTGGAGCCCCATCTTTTTC   | This study            |                       |
| gelED                                                                           | AGTTCATGTCTATTTTCTTCAC | This study            | 203                   |
| RTgelE                                                                          | ACAGTAACGCCTTCCGTTTG   | This study            |                       |
| RTaggL                                                                          | TGATGAAAACCAACGCAGAC   | This study            | 71                    |
| aggR                                                                            | AAACGGCAAGACAAGTAAATA  | This study            |                       |

### References

Clermont, O., Bonacorsi, S., and Bingen, E. (2000). Rapid and simple determination of the *Escherichia coli* phylogenetic group. *Appl. Environ. Microbiol.* 66, 4555–4558.
